# Supplementary material for: WhatsApp-Delivered Intervention for Continued Learning for Nurses in Pakistan During the COVID-19 Pandemic: Results of a Randomized-Controlled Trial
Source: PubMed Central journal article supplement (PMC8885589; doi:10.3389/fpubh.2022.739761), 2022-02-15
Supplement: Table_1.pdf [file Table_1.pdf]

## Supplementary Table 1

Demographic characteristics associated with infection control, coronavirus knowledge, and leadership and conflict management (at baseline)

|                          | IC               |                        |                 | CK               |                        |                 | L&CM             |                        |                 |
|--------------------------|------------------|------------------------|-----------------|------------------|------------------------|-----------------|------------------|------------------------|-----------------|
|                          | Mean $\pm$ SD    | Standard Error of Mean | <i>p</i> value* | Mean $\pm$ SD    | Standard Error of Mean | <i>p</i> value* | Mean $\pm$ SD    | Standard Error of Mean | <i>p</i> value* |
| Age                      |                  |                        |                 |                  |                        |                 |                  |                        |                 |
| 20-29 years              | 31.55 $\pm$ 0.96 | 0.06                   | <b>0.026</b>    | 31.52 $\pm$ 1.13 | 0.08                   | <b>0.011</b>    | 31.49 $\pm$ 1.16 | 0.08                   | 0.230           |
| 30-39 years              | 31.68 $\pm$ 0.85 | 0.12                   |                 | 31.59 $\pm$ 1.16 | 0.17                   |                 | 31.65 $\pm$ 0.80 | 0.12                   |                 |
| 40+ years                | 30.50 $\pm$ 2.50 | 1.02                   |                 | 30.00 $\pm$ 3.34 | 1.36                   |                 | 30.83 $\pm$ 2.04 | 0.83                   |                 |
| Gender                   |                  |                        |                 |                  |                        |                 |                  |                        |                 |
| Female                   | 31.55 $\pm$ 1.03 | 1.03                   | 0.909           | 31.52 $\pm$ 1.22 | 0.10                   | 0.688           | 31.47 $\pm$ 1.16 | 0.09                   | 0.608           |
| Male                     | 31.54 $\pm$ 0.98 | 0.98                   |                 | 31.45 $\pm$ 1.28 | 0.13                   |                 | 31.55 $\pm$ 1.08 | 0.11                   |                 |
| Type of Contract         |                  |                        |                 |                  |                        |                 |                  |                        |                 |
| Permanent                | 31.56 $\pm$ 0.97 | 0.07                   | 0.800           | 31.57 $\pm$ 1.21 | 0.09                   | 0.222           | 31.57 $\pm$ 1.04 | 0.08                   | 0.190           |
| Temporary                | 31.52 $\pm$ 1.07 | 0.11                   |                 | 31.36 $\pm$ 1.30 | 0.14                   |                 | 31.37 $\pm$ 1.27 | 0.13                   |                 |
| Years of Service         |                  |                        |                 |                  |                        |                 |                  |                        |                 |
| > 6 years                | 31.60 $\pm$ 1.00 | 0.07                   | 0.230           | 31.55 $\pm$ 1.19 | 0.09                   | 0.255           | 31.53 $\pm$ 1.12 | 0.08                   | 0.492           |
| 0-5 years                | 31.42 $\pm$ 1.03 | 0.12                   |                 | 31.34 $\pm$ 1.37 | 0.16                   |                 | 31.42 $\pm$ 1.15 | 0.14                   |                 |
| Monthly Income           |                  |                        |                 |                  |                        |                 |                  |                        |                 |
| > PKR 59,000 / USD 383.7 | 31.66 $\pm$ 0.77 | .09                    | 0.276           | 31.73 $\pm$ 0.84 | 0.10                   | <b>0.049</b>    | 31.59 $\pm$ 1.03 | 0.12                   | 0.451           |
| < PKR 59,000/ USD 383.7  | 31.50 $\pm$ 1.09 | .08                    |                 | 31.40 $\pm$ 1.37 | 0.10                   |                 | 31.47 $\pm$ 1.17 | 1.17                   |                 |
| Last Degree              |                  |                        |                 |                  |                        |                 |                  |                        |                 |
| BSc or above             | 31.64 $\pm$ 0.88 | 0.08                   | 0.170           | 31.68 0.97       | 0.09                   | <b>0.032</b>    | 31.56 1.10       | 0.10                   | 0.439           |
| Diploma                  | 31.46 $\pm$ 1.10 | 0.09                   |                 | 31.33 1.42       | 0.12                   |                 | 31.45 1.16       | 0.10                   |                 |
| Marital Status           |                  |                        |                 |                  |                        |                 |                  |                        |                 |
| Single                   | 31.52 $\pm$ 1.02 | 0.08                   | 0.591           | 31.44 $\pm$ 1.27 | 0.09                   | 0.369           | 31.45 1.20       | 0.09                   | 0.302           |
| Currently Married        | 31.60 $\pm$ 0.98 | 0.11                   |                 | 31.60 $\pm$ 1.19 | 0.13                   |                 | 31.61 0.95       | 0.10                   |                 |

\* Statistically significant relationship ( $p < 0.05$ ) for ANOVA results
